# Supplementary material for: Audiovisual task switching rapidly modulates sound encoding in mouse auditory cortex
Source: eLife. 2022 Aug 18;11:e75839. doi: 10.7554/eLife.75839 (PMC9427107; doi:10.7554/eLife.75839)
Supplement: Figure 4—source data 1. [file elife-75839-fig4-data1.xlsx]

## Sheet: AR_AU raw FR
Figure 4 - source data 1.A
Analysis: AR* response FR across rules
Group	n	A-rule mean FR (Hz)	±SD	V-rule mean FR (Hz)	±SD	WSR Z-value	p-value	FDR-adjusted p-value	Median fold change across rules (FDR-adj p<0.05 only)
Super. BS	49	3.78	6.54	3.58	5.26	-0.49	0.62	0.744	--
Super. NS	27	13.49	15.52	14.02	18.1	0.22	0.83	0.83	--
Mid. BS	127	6.48	14.49	5.88	9.19	1.03	0.3	0.45	--
Mid. NS	28	13.11	10.6	16.14	11.17	2.23	0.026	0.052	--
Deep BS	333	5.26	7.83	6.06	8.84	4.08	4.6e-05	0.000276	0.89
Deep NS	66	19.87	17.84	23.36	20.68	2.9	0.0038	0.0114	0.87
Figure 4 - source data 1.B
Analysis: AU* response FR across rules
Group	n	A-rule mean FR (Hz)	±SD	V-rule mean FR (Hz)	±SD	WSR Z-value	p-value	FDR-adjusted p-value	Median fold change across rules (FDR-adj p<0.05 only)
Super. BS	46	4.39	7.8	3.44	5.69	-1.24	0.21	0.252	--
Super. NS	27	13.72	11.74	13.9	10.47	0.14	0.89	0.89	--
Mid. BS	122	5.78	11.48	5.44	7.07	1.38	0.17	0.252	--
Mid. NS	28	12.73	9.31	16.4	11.69	2.3	0.021	0.063	--
Deep BS	321	4.69	7.58	5.82	10.01	5.11	3.3e-07	1.98e-06	0.81
Deep NS	66	17.39	14.11	19.24	13.78	1.91	0.056	0.112	--
