# Supplementary material for: Audiovisual task switching rapidly modulates sound encoding in mouse auditory cortex
Source: eLife. 2022 Aug 18;11:e75839. doi: 10.7554/eLife.75839 (PMC9427107; doi:10.7554/eLife.75839)
Supplement: Figure 4—source data 2. [file elife-75839-fig4-data2.xlsx]

## Sheet: RDS response FR across rule
Figure 4 - source data 2.
Analysis: RDS response FR across rules
Group	n	A-rule mean FR (Hz)	±SD	V-rule mean FR (Hz)	±SD	WSR Z-value	p-value	FDR-adjusted p-value	Median fold change across rules (FDR-adj p<0.05 only)
Super. BS	45	3.05	5.54	2.69	3.32	1.44	0.15	0.18	--
Super. NS	23	9.21	8.23	9.8	5.97	0.52	0.61	0.61	--
Mid. BS	112	3.66	5.95	4.17	5.33	3.09	0.002	0.006	0.85
Mid. NS	28	8.55	7.68	11.89	8.87	2.69	0.0072	0.0144	0.65
Deep BS	309	3.37	4.25	4.11	5.32	5.2	2e-07	1.2e-06	0.84
Deep NS	64	13.55	11.44	15.77	12.54	2.45	0.014	0.021	0.8
