# Supplementary material for: Audiovisual task switching rapidly modulates sound encoding in mouse auditory cortex
Source: eLife. 2022 Aug 18;11:e75839. doi: 10.7554/eLife.75839 (PMC9427107; doi:10.7554/eLife.75839)
Supplement: Figure 5—source data 1. [file elife-75839-fig5-data1.xlsx]

## Sheet: Pre-stimulus FR across rule
Figure 5 - source data 1
Analysis: Pre-stimulus FR across rules
Group	n	A-rule mean FR (fold change)	±SD	V-rule mean FR (fold change)	±SD	WSR Z-value	p-value	FDR-adjusted p-value	Median fold change across rules (FDR-adj p<0.05 only)
Super. BS	51	3.15	5.57	2.36	3.25	-1.61	0.11	0.132	--
Super. NS	27	9.59	8.68	8.99	7.68	-1.06	0.29	0.29	--
Mid. BS	127	3.99	7.23	4.1	5	2.01	0.045	0.072	--
Mid. NS	28	10.46	9.63	13.44	10.95	2.48	0.013	0.039	0.71
Deep BS	336	3.44	4.55	4.07	5.37	4.49	7e-06	4.2e-05	0.87
Deep NS	66	13.67	11.75	15.02	12.55	1.98	0.048	0.072	--
