# Supplementary material for: Audiovisual task switching rapidly modulates sound encoding in mouse auditory cortex
Source: eLife. 2022 Aug 18;11:e75839. doi: 10.7554/eLife.75839 (PMC9427107; doi:10.7554/eLife.75839)
Supplement: Figure 5—source data 2. [file elife-75839-fig5-data2.xlsx]

## Sheet: Baseline-adjusted FR
Figure 5 - source data 2.A
Analysis: AR* baseline-adjusted FR across rules
Group	n	A-rule mean FR (fold change)	±SD	V-rule mean FR (fold change)	±SD	WSR Z-value	p-value	FDR-adjusted p-value	Median fold change across rules (FDR-adj p<0.05 only)
Super. BS	44	3.7	9.92	4.64	9.64	2.37	0.018	0.075	--
Super. NS	27	2.34	3.08	3.26	5.59	2.23	0.025	0.075	--
Mid. BS	125	2.69	4.47	3.23	7.55	0.06	0.95	0.95	--
Mid. NS	28	2.52	4.02	3.09	6.89	-0.55	0.58	0.708	--
Deep BS	310	8.51	45.06	8.95	53.43	-1.27	0.21	0.42	--
Deep NS	66	2.54	4.31	2.35	2.91	0.54	0.59	0.708	--
Figure 5 - source data 2.B
Analysis: AU* baseline-adjusted FR across rules
Group	n	A-rule mean FR (fold change)	±SD	V-rule mean FR (fold change)	±SD	WSR Z-value	p-value	FDR-adjusted p-value	Median fold change across rules (FDR-adj p<0.05 only)
Super. BS	43	1.92	1.92	2.3	2.95	1.06	0.29	0.435	--
Super. NS	27	2.57	3.49	4.59	12.67	2.07	0.039	0.144	--
Mid. BS	118	2.23	4.04	1.62	2.23	-1.52	0.13	0.26	--
Mid. NS	28	2	2.82	1.87	2.25	-0.48	0.63	0.63	--
Deep BS	306	4.46	23.66	4.24	21.24	1.98	0.048	0.144	--
Deep NS	66	2.05	2.72	2.46	4.99	0.61	0.54	0.63	--
