# Supplementary material for: Audiovisual task switching rapidly modulates sound encoding in mouse auditory cortex
Source: eLife. 2022 Aug 18;11:e75839. doi: 10.7554/eLife.75839 (PMC9427107; doi:10.7554/eLife.75839)
Supplement: Figure 6—source data 1. [file elife-75839-fig6-data1.xlsx]

## Sheet: Stimulus mod by tuning
Figure 6 - source data 1.A
Analysis: Stimulus response modulation across rules by tuned/untuned, BS cells
Group	Stimulus	n	Mean FR resp across rules (fold change)	±SD	WSR Z-value (vs 1 [no modulation by rule])	p-value	FDR-corrected p-value (if any p<0.05)
Tuned	AR*	121	0.966631	0.993769	-1.30158	0.193061	0.1931
	AU*	120	0.903749	0.979258	-1.56608	0.117329	0.176
	RDS	121	0.903509	0.904515	-1.71798	0.0858006	0.176
Untuned	AR*	120	0.890526	0.971238	-2.27318	0.0230154	0.0230154
	AU*	118	0.758385	1.50766	-2.85064	0.00436313	0.0065447
	RDS	121	0.770576	0.506742	-4.45542	8.37273e-06	2.511e-05
Note: fold change is A-rule / V-rule
Figure 6 - source data 1.B
Analysis: Stimulus response modulation across rules by tuned/untuned, NS cells
Group	Stimulus	n	Mean FR resp across rules (fold change)	±SD	WSR Z-value (vs 1 [no modulation by rule])	p-value	FDR-corrected p-value
Tuned	AR*	51	0.9664	0.63708	-1.22792	0.219475	0.2195
	AU*	51	0.964286	0.71393	-0.834239	0.404147	0.4041
	RDS	51	0.931994	0.736798	-1.04045	0.298129	0.2981
Untuned	AR*	51	0.844868	0.780396	-2.6152	0.00891759	0.00891759
	AU*	51	0.707244	0.914249	-3.29009	0.00100156	0.00150235
	RDS	51	0.734192	0.461815	-4.14307	3.42684e-05	0.0001029
Note: fold change is A-rule / V-rule
Figure 6 - source data 1.C
Analysis: Stimulus response modulation across rules by characteristic frequency, BS cells
Stimulus response	CF tuning	n	Mean FR resp across rules (fold change)	±SD	Kruskal-Wallis non-parametric ANOVA H-stat	p-value	FDR-corrected p-value
AR*	Near AR	44	0.961112	0.707031	3.38766	0.183814	0.184
	Near AU	10	1.35222	1.81491
	Other	51	0.966102	0.924556
AU*	Near AR	43	0.992308	1.08961	5.55405	0.0622233	0.124
	Near AU	10	1.0625	0.966583
	Other	52	0.779015	0.851247
Note: fold change is A-rule / V-rule
Figure 6 - source data 1.D
Analysis: Stimulus response modulation across rules by characteristic frequency, NS cells
Stimulus response	CF tuning	n	Mean FR resp across rules (fold change)	±SD	Kruskal-Wallis non-parametric ANOVA H-stat	p-value	FDR-corrected p-value
AR*	Near AR	24	0.94071	0.436217	0.527085	0.768325	0.768
	Near AU	7	1.03918	0.103991
	Other	18	0.829841	0.956572
AU*	Near AR	24	0.951803	0.617687	1.24432	0.536783	0.768
	Near AU	7	1.09882	0.403744
	Other	18	0.758005	0.957971
Note: fold change is A-rule / V-rule
