# Supplementary material for: Audiovisual task switching rapidly modulates sound encoding in mouse auditory cortex
Source: eLife. 2022 Aug 18;11:e75839. doi: 10.7554/eLife.75839 (PMC9427107; doi:10.7554/eLife.75839)
Supplement: Figure 7—source data 1. [file elife-75839-fig7-data1.xlsx]

## Sheet: Decoder accuracy, A vs. V
Figure 7 - source data 1.A
Analysis: decoder accuracy, A-rule vs V-rule by stimulus type
Accuracy (%) ± SD
Group	ARVR	ARVU	AUVR	AUVU
BS	56.5 ± 12.2	57.1 ± 11.6	57.4 ± 11.5	56.7 ± 12.3
NS	60.8 ± 13.4	62.1 ± 12.2	62.8 ± 13.1	60.0 ± 12.4
One-way Wilcoxon signed rank (WSR) vs chance [50%]: all p≤1.1E-12, all |z|≥7.1
Figure 7 - source data 1.B
Analysis: decoder accuracy, A-rule vs V-rule by depth, BS/NS
Accuracy (%) ± SD
Group	Avg., all stim
Super. BS	56.0 ± 10.8
Super. NS	59.6 ± 8.9
Mid. BS	55.8 ± 10.3
Mid. NS	60.5 ± 12.6
Deep BS	57.2 ± 10.5
Deep NS	62.9 ± 13.4
One-way WSR vs chance [50%]: all p≤2.9E-4, all |z|≥6.3
