# Supplementary material for: Audiovisual task switching rapidly modulates sound encoding in mouse auditory cortex
Source: eLife. 2022 Aug 18;11:e75839. doi: 10.7554/eLife.75839 (PMC9427107; doi:10.7554/eLife.75839)
Supplement: Figure 7—source data 2. [file elife-75839-fig7-data2.xlsx]

## Sheet: Decorder accuracy, AR v AU
Figure 7 - source data 2.A
Analysis: decoder accuracy of AR* vs AU* across depth groups
Group	n	A-rule % correct	±SD	WSR Z-value (vs 50% [chance])	p-value	V-rule % correct	±SD	WSR Z-value (vs 50% [chance])	p-value
Super. BS	48	62.58	12.66	5.18	2.2e-07	62.58	13	5.21	1.9e-07
Super. NS	30	71.14	15.49	4.51	6.3e-06	71.93	14.02	4.58	4.7e-06
Mid. BS	98	63.19	14.85	7.33	2.2e-13	63.54	14.79	7.57	3.6e-14
Mid. NS	25	73.96	13.62	4.35	1.4e-05	72.35	14.14	4.37	1.2e-05
Deep BS	233	67.81	15.19	12.5	7.2e-36	67.09	15.3	12.63	1.4e-36
Deep NS	61	72.18	15.74	6.45	1.1e-10	71.97	15.99	6.48	9.5e-11
Figure 7 - source data 2.B
Analysis: decoder accuracy of ARVR vs AUVR across depth groups
Group	n	A-rule % correct	±SD	WSR Z-value (vs 50% [chance])	p-value	V-rule % correct	±SD	WSR Z-value (vs 50% [chance])	p-value
Super. BS	45	63.54	13.4	4.93	8.3e-07	63.8	13.75	5.06	4.1e-07
Super. NS	30	70.67	16.23	4.45	8.5e-06	71.12	15.88	4.25	2.2e-05
Mid. BS	94	63.47	15.37	6.85	7.6e-12	63.01	16.36	6.34	2.3e-10
Mid. NS	25	73.35	14.39	4.37	1.2e-05	71.95	14.62	4.32	1.6e-05
Deep BS	207	69.03	15.86	11.62	3.4e-31	68.27	16.31	11.35	7.8e-30
Deep NS	60	71.99	15.39	6.42	1.4e-10	72.02	17.35	6.14	8.3e-10
Figure 7 - source data 2.C
Analysis: decoder accuracy of ARVU vs AUVU across depth groups
Group	n	A-rule % correct	±SD	WSR Z-value (vs 50% [chance])	p-value	V-rule % correct	±SD	WSR Z-value (vs 50% [chance])	p-value
Super. BS	45	62.67	13.67	4.83	1.4e-06	62.91	13.79	4.99	5.9e-07
Super. NS	29	71.08	16.25	4.36	1.3e-05	72.88	13.79	4.59	4.3e-06
Mid. BS	93	63.76	14.97	7.16	8.1e-13	64.57	15.21	7.35	2e-13
Mid. NS	25	74.56	14	4.35	1.4e-05	72.75	15.14	4.32	1.6e-05
Deep BS	224	67.68	16.21	11.63	3e-31	67.24	16.39	11.77	5.6e-32
Deep NS	61	72.58	17.42	6.2	5.6e-10	72.3	16.22	6.48	9e-11
