# Supplementary material for: Audiovisual task switching rapidly modulates sound encoding in mouse auditory cortex
Source: eLife. 2022 Aug 18;11:e75839. doi: 10.7554/eLife.75839 (PMC9427107; doi:10.7554/eLife.75839)
Supplement: Figure 7—source data 3. [file elife-75839-fig7-data3.xlsx]

## Sheet: Decoding across rules
Figure 7 - source data 3.A
Analysis: Wilcoxon signed-rank comparison of AR* vs AU* decoding across rules
** For raw data values, refer to Figure 7 - source data 2.A
Group	n	WSR Z-value across rules	p-value
Super. BS	48	-0.3	0.77
Super. NS	30	0.69	0.49
Mid. BS	98	0.61	0.54
Mid. NS	25	-1.39	0.17
Deep BS	233	-1.11	0.27
Deep NS	61	-0.41	0.68
Figure 7 - source data 3.B
Analysis: Wilcoxon signed-rank comparison of ARVR vs AUVR decoding accuracy across rules
** For raw data values, refer to Figure 7 - source data 2.B
Group	n	WSR Z-value across rules	p-value
Super. BS	45	0.06	0.95
Super. NS	30	0.38	0.71
Mid. BS	94	-0.17	0.87
Mid. NS	25	-0.9	0.37
Deep BS	207	-0.92	0.36
Deep NS	60	0.57	0.57
Figure 7 - source data 3.C
Analysis: Wilcoxon signed-rank comparison of ARVU vs AUVU decoding accuracy across rules
** For raw data values, refer to Figure 7 - source data 2.C
Group	n	WSR Z-value across rules	p-value
Super. BS	45	0.13	0.9
Super. NS	29	0.9	0.37
Mid. BS	93	0.81	0.42
Mid. NS	25	-1.17	0.24
Deep BS	224	-0.53	0.59
Deep NS	61	-0.87	0.39
