# Supplementary material for: Audiovisual task switching rapidly modulates sound encoding in mouse auditory cortex
Source: eLife. 2022 Aug 18;11:e75839. doi: 10.7554/eLife.75839 (PMC9427107; doi:10.7554/eLife.75839)
Supplement: Figure 7—source data 5. [file elife-75839-fig7-data5.xlsx]

## Sheet: RDS MI across rules 
Figure 7 - source data 5
Analysis: Comparison of STRF MI (bits/spk) across rules
Group	n	A-rule mean bits/spk	±SD	V-rule mean bits/spk	±SD	WSR Z-value across rules	p-value	FDR-adjusted p-value	Median fold change across rules (FDR-adj p<0.05 only)
Super. BS	8	0.16	0.21	0.16	0.22	-0.17	0.87	0.92	--
Super. NS	8	0.07	0.08	0.07	0.08	-1.54	0.12	0.24	--
Mid. BS	27	0.08	0.1	0.06	0.07	-0.88	0.38	0.57	--
Mid. NS	13	0.03	0.03	0.04	0.05	0.1	0.92	0.92	--
Deep BS	50	0.15	0.22	0.13	0.21	-3.05	0.0023	0.0138	1.25
Deep NS	14	0.04	0.05	0.03	0.03	-1.66	0.096	0.24	--
