# Supplementary material for: Audiovisual task switching rapidly modulates sound encoding in mouse auditory cortex
Source: eLife. 2022 Aug 18;11:e75839. doi: 10.7554/eLife.75839 (PMC9427107; doi:10.7554/eLife.75839)
Supplement: Figure 8—source data 1. [file elife-75839-fig8-data1.xlsx]

## Sheet: Pre-stim activity, FA vs CR trs
Figure 8 - source data 1.A
Analysis: Pre-stimulus FRs for false alarm vs. correct reject in A-rule
Inclusion filter: behavior sessions with >10 FA and CR trials in A-rule
Group	n (units)	CR trials mean pre-stim FR (Hz)	±SD	FA trials mean pre-stim FR (Hz)	±SD	WSR Z-value across outcomes	p-val	FDR-adjusted p-val	Mean FR difference (Hz): FA-CR (FDR-adj p<0.05 only)
	Units with enhanced FRs in A-rule
Super. BS	10	9.47124	9.71194	8.52413	9.51083	1.17219	0.241121	0.289346	--
Mid. BS	18	3.65599	3.89467	3.0936	2.65306	0.457333	0.647432	0.647432	--
Deep BS	63	3.61328	4.43198	3.51327	4.88866	1.43427	0.151496	0.289346	--
	Units with suppressed FRs in A-rule
Super. BS	9	2.14225	2.62576	2.51297	2.52548	-1.48087	0.138641	0.289346	--
Mid. BS	36	3.11514	3.68558	3.58927	3.72563	-1.24114	0.214556	0.289346	--
Deep BS	98	3.35813	3.80373	3.70746	3.6432	-3.14849	0.00164119	0.00984713	0.349328
Figure 8 - source data 1.B
Analysis: Pre-stimulus FRs for false alarm vs. correct reject in V-rule
Inclusion filter: behavior recordings with >10 FA and CR trials in V-rule
Group	n (units)	CR trials mean pre-stim FR (Hz)	±SD	FA trials mean pre-stim FR (Hz)	±SD	WSR Z-value across outcomes	p-val	FDR-adjusted p-val	Mean FR difference (Hz): FA-CR (FDR-adj p<0.05 only)
	Units with enhanced FRs in A-rule
Super. BS	10	5.90749	5.4938	5.34474	4.57102	0.356753	0.721277	0.736928	--
Mid. BS	17	7.66451	8.24591	7.99517	9.21602	-0.544388	0.586174	0.736928	--
Deep BS	27	3.11098	3.43654	3.71286	4.5109	-1.58565	0.112819	0.676912	--
	Units with suppressed FRs in A-rule
Super. BS	4	4.03489	3.65793	4.91551	5.37526	-0.730297	0.465209	0.736928	--
Mid. BS	27	5.37801	4.83952	5.20702	5.91208	0.8649	0.387094	0.736928	--
Deep BS	95	5.71985	7.1453	5.66993	7.6113	0.335924	0.736928	0.736928	--
