# Supplementary material for: Audiovisual task switching rapidly modulates sound encoding in mouse auditory cortex
Source: eLife journal article supplement (doi:10.7554/elife.75839), 2022-08-18
Supplement: supp [file elife_poa_e75839_Figure_7_source_data_4.xlsx]

## Sheet: MI efficiency across rules
Figure 7 - source data 4.A
Analysis: MI efficiency of ARVR vs AUVR across rules
Group	n	A-rule mean bits/spk	±SD	V-rule mean bits/spk	±SD	WSR Z-value across rules	p-value	FDR-adjusted p-value	Median fold change across rules (FDR-adj p<0.05 only)
Super. BS	48	0.18	0.14	0.15	0.11	-1.47	0.14	0.396	--
Super. NS	30	0.1	0.09	0.08	0.06	-1.08	0.28	0.396	--
Mid. BS	98	0.13	0.11	0.14	0.13	0.78	0.43	0.43	--
Mid. NS	25	0.07	0.07	0.07	0.08	-0.98	0.33	0.396	--
Deep BS	233	0.19	0.19	0.15	0.13	-4.06	4.9e-05	0.000294	1.19
Deep NS	61	0.06	0.06	0.06	0.05	-1.28	0.2	0.396	--
Figure 7 - source data 4.B
Analysis: MI efficiency of ARVR vs AUVR across rules
Group	n	A-rule mean bits/spk	±SD	V-rule mean bits/spk	±SD	WSR Z-value across rules	p-value	FDR-adjusted p-value	Median fold change across rules (FDR-adj p<0.05 only)
Super. BS	45	0.16	0.13	0.14	0.14	-1.31	0.19	0.57	--
Super. NS	30	0.1	0.09	0.08	0.07	-1	0.32	0.64	--
Mid. BS	94	0.13	0.13	0.14	0.13	0.62	0.54	0.81	--
Mid. NS	25	0.07	0.08	0.07	0.08	-0.31	0.76	0.91	--
Deep BS	207	0.17	0.18	0.13	0.12	-3.9	9.7e-05	0.000582	1.2
Deep NS	60	0.06	0.06	0.06	0.06	-0.12	0.91	0.91	--
Figure 7 - source data 4.C
Analysis: MI efficiency of ARVU vs AUVU across rules
Group	n	A-rule mean bits/spk	±SD	V-rule mean bits/spk	±SD	WSR Z-value across rules	p-value	FDR-adjusted p-value	Median fold change across rules (FDR-adj p<0.05 only)
Super. BS	45	0.18	0.18	0.15	0.12	-0.34	0.73	0.8	--
Super. NS	29	0.1	0.1	0.07	0.06	-0.25	0.8	0.8	--
Mid. BS	93	0.11	0.1	0.13	0.13	0.66	0.51	0.765	--
Mid. NS	25	0.08	0.07	0.07	0.08	-0.79	0.43	0.765	--
Deep BS	224	0.18	0.18	0.15	0.14	-2.75	0.006	0.036	1.15
Deep NS	61	0.06	0.06	0.06	0.05	-1.33	0.19	0.57	--
